# Supplementary material
Source: Springer Nature journal article supplement (https://www.springermedizin.de/resource/supplementary/12885_2014_4793_MOESM5_ESM.pdf/9467288)

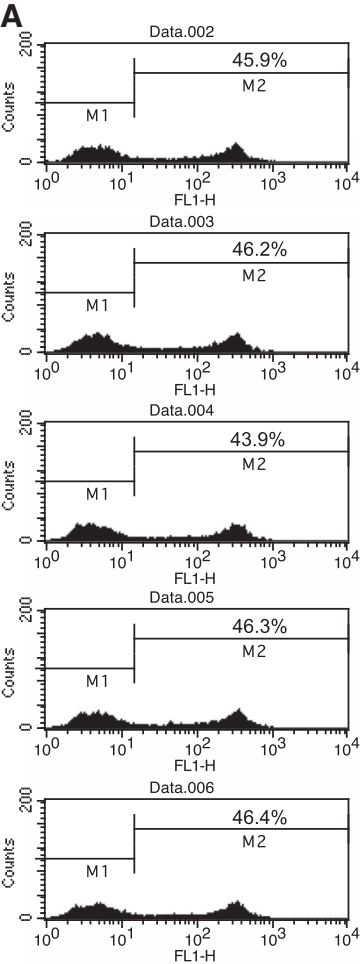

Control vector

S6K1 WT

S6K1T389E

S6K1T389A

GLI1

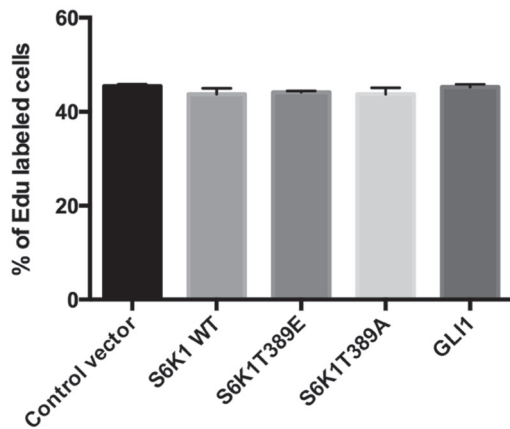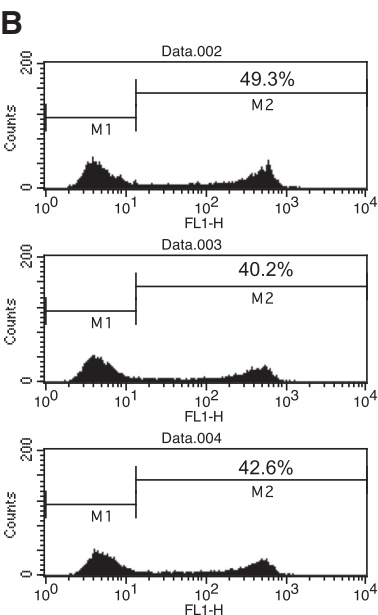

siCN + pCMV

siS6K1 + pCMV

siS6K1 + pGLI1

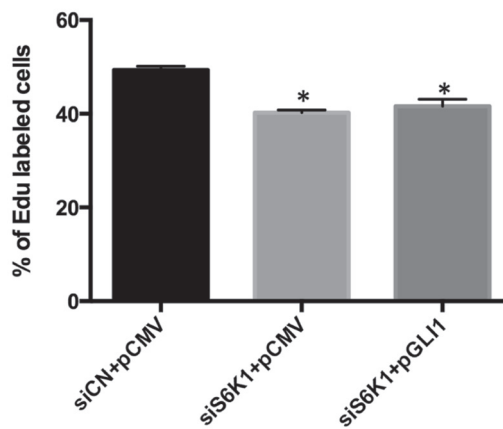

Supplement: MOESM5 [file 9467288]
